# Supplementary material for: Long live the wasp: adult longevity in captive colonies of the eusocial paper wasp Polistes canadensis (L.)
Source: PeerJ. 2015 Mar 24;3:e848. doi: 10.7717/peerj.848 (PMC4375972; doi:10.7717/peerj.848)
Supplement: Supplemental Information 5 — Data of all wasp deaths and variables used in this study. [file peerj-03-848-s005.xlsx]

## Sheet: Final survival dataset
Colony	Index	Period of death	Event	Experiment
M1	M8-1	0	0	natal
M1	M8-2	1	0	natal
M1	M8-3	1	0	natal
M1	M8-4	2	0	natal
M1	M8-5	2	0	natal
M1	M8-6	3	0	natal
M1	M8-7	3	0	natal
M1	M8-8	5	0	natal
M1	M8-9	5	0	natal
M1	M8-10	6	0	natal
M1	M8-11	7	0	natal
M1	M8-12	8	0	natal
M1	M8-13	8	0	natal
M1	M8-14	8	0	natal
M1	M8-15	11	0	natal
M1	M8-16	12	0	natal
M1	M8-17	12	0	natal
M1	M8-18	12	0	natal
M1	M8-19	12	0	natal
M1	M8-20	12	0	natal
M1	M8-21	12	0	natal
M1	M8-22	14	0	natal
M1	M8-23	14	0	natal
M1	M8-24	14	0	natal
M1	M8-25	15	1	natal
M2	M8-26	1	0	natal
M2	M8-27	2	0	natal
M2	M8-28	3	0	natal
M2	M8-29	3	0	natal
M2	M8-30	3	0	natal
M2	M8-31	4	0	natal
M2	M8-32	5	0	natal
M2	M8-33	5	0	natal
M2	M8-34	5	0	natal
M2	M8-35	6	0	natal
M2	M8-36	6	0	natal
M2	M8-37	6	0	natal
M2	M8-38	7	0	natal
M2	M8-39	8	0	natal
M2	M8-40	8	0	natal
M2	M8-41	8	0	natal
M2	M8-42	8	0	natal
M2	M8-43	9	0	natal
M2	M8-44	10	0	natal
M2	M9-1	11	0	natal
M2	M9-2	11	0	natal
M2	M9-3	11	0	natal
M2	M9-4	11	0	natal
M2	M9-5	11	0	natal
M2	M9-6	11	0	natal
M3	M9-7	0	0	natal
M3	M9-8	0	0	natal
M3	M9-9	1	0	natal
M3	M9-10	1	0	natal
M3	M9-11	2	0	natal
M3	M9-12	3	0	natal
M3	M9-13	5	0	natal
M3	M9-14	5	0	natal
M3	M9-15	7	0	natal
M3	M9-16	7	0	natal
M3	M9-17	7	0	natal
M3	M9-18	7	0	natal
M3	M9-19	10	0	natal
M3	M9-20	11	0	natal
M3	M9-21	11	0	natal
M3	M9-22	11	0	natal
M3	M9-23	11	0	natal
M3	M9-24	12	0	natal
M3	M10-1	12	0	natal
M4	M10-2	0	0	natal
M4	M10-3	1	0	natal
M4	M10-4	2	0	natal
M4	M10-5	2	0	natal
M4	M10-6	2	0	natal
M4	M10-7	3	0	natal
M4	M10-8	3	0	natal
M4	M10-9	3	0	natal
M4	M10-10	3	0	natal
M4	M10-11	3	0	natal
M4	M10-12	4	0	natal
M4	M10-13	4	0	natal
M4	M10-14	8	0	natal
M4	M10-15	8	0	natal
M4	M10-16	9	0	natal
M4	M10-17	9	0	natal
M4	M10-18	10	0	natal
M4	M10-19	11	0	natal
M4	M10-20	11	0	natal
M5	M10-21	0	0	natal
M5	M10-22	1	0	natal
M5	M10-23	1	0	natal
M5	M10-24	3	0	natal
M5	M10-25	3	0	natal
M5	M10-26	4	0	natal
M5	M10-27	6	0	natal
M5	M10-28	10	0	natal
M5	M8A-1	11	0	natal
M6	M8A-2	1	0	natal
M6	M8A-3	2	0	natal
M6	M8A-4	2	0	natal
M6	M8A-5	5	0	natal
M6	M8A-6	9	0	natal
M6	M8A-7	11	0	natal
M6	M8A-8	12	0	natal
M6	M8A-9	12	0	natal
M6	M8A-10	12	0	natal
M6	M8A-11	12	0	natal
M6	M8A-12	12	0	natal
M6	M8A-13	14	0	natal
M7	M8A-14	0	0	natal
M7	M8A-15	0	0	natal
M7	M8A-16	0	0	natal
M7	M8A-17	0	0	natal
M7	M8A-18	0	0	natal
M7	M8A-19	0	0	natal
M7	M9A-1	0	0	natal
M7	M9A-2	0	0	natal
M7	M9A-3	2	0	natal
M7	M9A-4	3	0	natal
M7	M9A-5	3	0	natal
M7	M9A-6	5	0	natal
M7	M9A-7	5	0	natal
M7	M9A-8	5	0	natal
M7	M9A-9	5	0	natal
M7	M9A-10	5	0	natal
M7	M9A-11	6	0	natal
M7	M9A-12	6	0	natal
M7	M9A-13	6	0	natal
M7	M9A-14	7	0	natal
M7	M10A-1	7	0	natal
M7	M10A-2	8	0	natal
M7	M10A-3	8	0	natal
M7	M10A-4	9	0	natal
M7	M10A-5	9	0	natal
M7	M10A-6	9	0	natal
M7	M10A-7	9	0	natal
M7	M10A-8	9	0	natal
M7	M10A-9	9	0	natal
M7	M10A-10	9	0	natal
M7	M10A-11	10	0	natal
M7	M10A-12	11	0	natal
M7	M10A-13	11	0	natal
M7	M9B-1	14	0	natal
M8	M9B-2	20	0	original	8
M8	M9B-3	40	0	original	8
M8	M9B-4	80	0	original	8
M8	M9B-5	80	0	original	8
M8	M9B-6	80	0	original	8
M8	M9B-7	80	1	original	8
M8	M9B-8	80	1	original	8
M8	M9B-9	80	1	original	8
M8	M8B-1	80	1	original	8
M8	M8B-2	80	1	original	8
M8	M8B-3	80	1	original	8
M8	M8B-4	80	1	original	8
M8	M8B-5	80	1	original	8
M8	M8B-6	80	1	original	8
M8	M8B-7	80	1	original	8
M8	M8B-8	80	1	original	8
M8	M8B-9	80	1	original	8
M8	M10B-1	80	1	original	8
M8	M10B-2	80	1	original	8
M8	M10B-3	80	1	original	8
M8	M10B-4	80	1	original	8
M8	M10B-5	80	1	original	8
M8	M10B-6	80	1	original	8
M8	M10B-7	80	1	original	8
M8	M10B-8	80	1	original	8
M8	M8-29	80	1	original	8
M8	M8-30	80	1	original	8
M8	M8-31	80	1	original	8
M8	M8-32	80	1	original	8
M8	M8-33	80	1	original	8
M8	M8-34	80	1	original	8
M9	M9-25	80	1	original	8
M9	M9-26	80	1	original	8
M9	M9-27	80	1	original	8
M9	M9-28	80	1	original	9
M9	M9-29	80	1	original	9
M9	M9-30	80	1	original	9
M9	M9-31	80	1	original	9
M9	M9-32	80	1	original	9
M9	M9-33	80	1	original	9
M9	M9-34	80	1	original	9
M9	M9-1	20	0	original	9
M9	M9-2	20	0	original	9
M9	M9-3	30	0	original	9
M9	M9-4	40	0	original	9
M9	M9-5	40	0	original	9
M9	M9-6	40	0	original	9
M9	M9-7	40	0	original	9
M9	M9-8	50	0	original	9
M9	M9-9	50	0	original	9
M9	M9-10	60	0	original	9
M9	M9-11	60	0	original	9
M9	M9-12	80	0	original	9
M9	M9-13	80	0	original	9
M9	M9-14	80	1	original	9
M9	M9-15	80	1	original	9
M9	M9-16	80	1	original	9
M9	M9-17	80	1	original	9
M9	M9-18	80	1	original	9
M9	M9-19	80	1	original	9
M9	M9-20	80	1	original	9
M9	M9-21	80	1	original	9
M9	M9-22	80	1	original	9
M9	M9-23	80	1	original	9
M9	M9-24	80	1	original	9
M10	M10-1	30	0	original	9
M10	M10-2	30	0	original	9
M10	M10-3	40	0	original	9
M10	M10-4	80	1	original	10
M10	M10-5	80	1	original	10
M10	M10-6	80	1	original	10
M10	M10-7	80	1	original	10
M10	M10-8	80	1	original	10
M10	M10-9	80	1	original	10
M10	M10-10	80	1	original	10
M10	M10-11	80	1	original	10
M10	M10-12	80	1	original	10
M10	M10-13	80	1	original	10
M10	M10-14	80	1	original	10
M10	M10-15	80	1	original	10
M10	M10-16	80	1	original	10
M10	M10-17	80	1	original	10
M10	M10-18	80	1	original	10
M10	M10-19	80	1	original	10
M10	M10-20	80	1	original	10
M10	M10-21	80	1	original	10
M10	M10-22	80	1	original	10
M10	M10-23	80	1	original	10
M10	M10-24	80	1	original	10
M8	M10-25	10	0	original	10
M8	M10-26	20	0	original	10
M8	M10-27	20	0	original	10
M8A	M10-28	1	0	Split	8
M8A	M8A-1	1	0	Split	8
M8A	M8A-2	1	0	Split	8
M8A	M8A-3	5	0	Split	8
M8A	M8A-4	5	0	Split	8
M8A	M8A-5	7	0	Split	8
M8A	M8A-6	17	0	Split	8
M8A	M8A-7	17	0	Split	8
M8A	M8A-8	17	0	Split	8
M8A	M8A-9	18	0	Split	8
M8A	M8A-10	18	0	Split	8
M8A	M8A-11	18	0	Split	8
M8A	M8A-12	18	0	Split	8
M8A	M8A-13	20	0	Split	8
M8A	M8A-14	21	0	Split	8
M8A	M8A-15	22	0	Split	8
M8A	M8A-16	22	0	Split	8
M8A	M8A-17	22	0	Split	8
M8A	M8A-18	22	0	Split	8
M9A	M8A-19	2	0	Split	9
M9A	M9A-1	5	0	Split	9
M9A	M9A-2	5	0	Split	9
M9A	M9A-3	5	0	Split	9
M9A	M9A-4	11	0	Split	9
M9A	M9A-5	12	0	Split	9
M9A	M9A-6	14	0	Split	9
M9A	M9A-7	14	0	Split	9
M9A	M9A-8	14	0	Split	9
M9A	M9A-9	14	0	Split	9
M9A	M9A-10	15	0	Split	9
M9A	M9A-11	16	0	Split	9
M9A	M9A-12	17	0	Split	9
M9A	M9A-13	17	0	Split	9
M10A	M9A-14	1	0	Split	10
M10A	M10A-1	1	0	Split	10
M10A	M10A-2	2	0	Split	10
M10A	M10A-3	5	0	Split	10
M10A	M10A-4	7	0	Split	10
M10A	M10A-5	7	0	Split	10
M10A	M10A-6	8	0	Split	10
M10A	M10A-7	8	0	Split	10
M10A	M10A-8	12	0	Split	10
M10A	M10A-9	14	0	Split	10
M10A	M10A-10	14	0	Split	10
M10A	M10A-11	20	0	Split	10
M10A	M10A-12	22	0	Split	10
M9B	M10A-13	1	0	Split	9
M9B	M9B-1	5	0	Split	9
M9B	M9B-2	5	0	Split	9
M9B	M9B-3	8	0	Split	9
M9B	M9B-4	12	0	Split	9
M9B	M9B-5	13	0	Split	9
M9B	M9B-6	16	0	Split	9
M9B	M9B-7	16	0	Split	9
M9B	M9B-8	17	0	Split	9
M8B	M9B-9	1	0	Split	8
M8B	M8B-1	1	0	Split	8
M8B	M8B-2	3	0	Split	8
M8B	M8B-3	6	0	Split	8
M8B	M8B-4	8	0	Split	8
M8B	M8B-5	10	0	Split	8
M8B	M8B-6	15	0	Split	8
M8B	M8B-7	16	0	Split	8
M8B	M8B-8	20	0	Split	8
M10B	M8B-9	1	0	Split	10
M10B	M10B-1	1	0	Split	10
M10B	M10B-2	2	0	Split	10
M10B	M10B-3	3	0	Split	10
M10B	M10B-4	6	0	Split	10
M10B	M10B-5	14	0	Split	10
M10B	M10B-6	15	0	Split	10
M10B	M10B-7	15	0	Split	10
